# Supplementary material for: Factors Affecting Population Dynamics of Helicoverpa zea (Lepidoptera: Noctuidae) in a Mixed Landscape with Bt Cotton and Peanut
Source: MDPI journal article supplement (doi:10.3390/insects14040395), 2023-04-19
Supplement: s1 [file s1]

**Table S1.** Global positioning system (G.P.S.) coordinates for traps on each farm from June 2017 to June 2019. Pheromone trapping was performed in the east (Jackson County) and west (Santa Rosa/Escambia counties) regions of the Florida Panhandle.

| Farm code | Region               | Crop      | Trap 1 (Latitude, Longitude) | Trap 2 (Latitude, Longitude) |
|-----------|----------------------|-----------|------------------------------|------------------------------|
| BT1       | Jackson              | Bt cotton | 30.871317, -85.018336        | 30.872386, -85.021106        |
| DR        | Jackson              | Bt cotton | 30.874031, -85.478622        | 30.873128, -85.476853        |
| DS        | Jackson              | Bt cotton | 30.839078, -85.447517        | 30.840475, -85.444456        |
| FR1       | Jackson              | Bt cotton | 30.905597, -85.082881        | 30.904869, -85.082067        |
| FR2       | Jackson              | Peanut    | 30.9017, -85.08985           | 30.904761, -85.089528        |
| PT        | Jackson              | Peanut    | 30.865683, -85.145228        | 30.867381, -85.140558        |
| WB        | Jackson              | Peanut    | 30.611589, -84.991003        | 30.609808, -84.99255         |
| WS        | Jackson              | Peanut    | 30.617711, -84.983369        | 30.617594, -84.981986        |
| BR2       | Santa Rosa/ Escambia | Bt cotton | 30.907483, -87.432872        | 30.911625, -87.434503        |
| DL2       | Santa Rosa/ Escambia | Bt cotton | 30.740631, -87.360261        | 30.740203, -87.349025        |
| DM        | Santa Rosa/ Escambia | Bt cotton | 30.933333, -87.170544        | 30.934764, -87.1602          |
| HE2       | Santa Rosa/ Escambia | Bt cotton | 30.985889, -87.461592        | 30.988472, -87.464247        |
| BR1       | Santa Rosa/ Escambia | Peanut    | 30.875667, -87.459228        | 30.8793, -87.462475          |
| DL1       | Santa Rosa/ Escambia | Peanut    | 30.743639, -87.364242        | 30.742422, -87.362931        |
| HE1       | Santa Rosa/ Escambia | Peanut    | 30.9816, -87.46605           | 30.982483, -87.469797        |
| TH        | Santa Rosa/ Escambia | Peanut    | 30.779403, -87.138925        | 30.778922, -87.135233        |
